# Supplementary material for: Integration of Adverse Outcome Pathways, Causal Networks and ‘Omics to Support Chemical Hazard Assessment
Source: Front Toxicol. 2022 Mar 24;4:786057. doi: 10.3389/ftox.2022.786057 (PMC8987526; doi:10.3389/ftox.2022.786057)
Supplement: Supplementary file 1 [file Table2.xlsx]

## Sheet: Table 2. Aflatoxin
CEL	Finding	Topography	Grade	Dose	Time	Whole slide glass Imag
No ChipData (---)	Change, eosinophilic	Periportal	slight	Low	24 hr	65383
No ChipData (---)	Single cell necrosis	Periportal	slight	Low	24 hr	65383
003017920010 (CEL)	Change, eosinophilic	Periportal	slight	Low	24 hr	65387
003017920010 (CEL)	Single cell necrosis	Periportal	slight	Low	24 hr	65387
003017920011 (CEL)	Change, eosinophilic	Periportal	slight	Low	24 hr	65395
003017920011 (CEL)	Single cell necrosis	Periportal	slight	Low	24 hr	65395
003017920012 (CEL)	Change, eosinophilic	Periportal	moderate	Middle	24 hr	65399
003017920012 (CEL)	Single cell necrosis	Periportal	moderate	Middle	24 hr	65399
No ChipData (---)	Change, eosinophilic	Periportal	slight	Middle	24 hr	65402
No ChipData (---)	Single cell necrosis	Periportal	slight	Middle	24 hr	65402
003017920013 (CEL)	Change, eosinophilic	Periportal	moderate	Middle	24 hr	65406
003017920013 (CEL)	Single cell necrosis	Periportal	moderate	Middle	24 hr	65406
No ChipData (---)	Cellular infiltration, mononuclear cell	Periportal	slight	Middle	24 hr	65410
No ChipData (---)	Change, eosinophilic	Periportal	slight	Middle	24 hr	65410
No ChipData (---)	Single cell necrosis	Periportal	moderate	Middle	24 hr	65410
003017920014 (CEL)	Cellular infiltration, mononuclear cell	Periportal	slight	Middle	24 hr	65414
003017920014 (CEL)	Change, eosinophilic	Periportal	moderate	Middle	24 hr	65414
003017920014 (CEL)	Single cell necrosis	Periportal	moderate	Middle	24 hr	65414
003017920015 (CEL)	Change, eosinophilic	Periportal	severe	High	24 hr	65418
003017920015 (CEL)	Single cell necrosis	Periportal	severe	High	24 hr	65418
003017920015 (CEL)	Cellular infiltration, mononuclear cell	Periportal	slight	High	24 hr	65418
003017920016 (CEL)	Change, eosinophilic	Periportal	moderate	High	24 hr	65422
003017920016 (CEL)	Single cell necrosis	Periportal	moderate	High	24 hr	65422
003017920016 (CEL)	Cellular infiltration, mononuclear cell	Periportal	slight	High	24 hr	65422
003017920017 (CEL)	Cellular infiltration, mononuclear cell	Periportal	moderate	High	24 hr	65426
003017920017 (CEL)	Change, eosinophilic	Periportal	severe	High	24 hr	65426
003017920017 (CEL)	Single cell necrosis	Periportal	severe	High	24 hr	65426
003017920017 (CEL)	Atrophy	Hepatocyte	slight	High	24 hr	65426
003017920018 (CEL)	Change, eosinophilic	Periportal	severe	High	24 hr	65430
003017920018 (CEL)	Single cell necrosis	Periportal	severe	High	24 hr	65430
003017920018 (CEL)	Atrophy	Hepatocyte	slight	High	24 hr	65430
003017920018 (CEL)	Cellular infiltration, mononuclear cell	Periportal	slight	High	24 hr	65430
003017920019 (CEL)	Change, eosinophilic	Periportal	moderate	High	24 hr	65434
003017920019 (CEL)	Single cell necrosis	Periportal	severe	High	24 hr	65434
003017920019 (CEL)	Atrophy	Hepatocyte	slight	High	24 hr	65434
003017920019 (CEL)	Cellular infiltration, mononuclear cell	Periportal	slight	High	24 hr	65434
