# Supplementary material for: Integration of Adverse Outcome Pathways, Causal Networks and ‘Omics to Support Chemical Hazard Assessment
Source: Front Toxicol. 2022 Mar 24;4:786057. doi: 10.3389/ftox.2022.786057 (PMC8987526; doi:10.3389/ftox.2022.786057)
Supplement: Supplementary file 2 [file Table3.xlsx]

## Sheet: Table 3. Thioacetamide
CEL	Finding	Topography	Grade	Dose	Time	Whole slide glass Imag
No ChipData (---)	NA	NA	P	Control	24 hr	-
003017674026 (CEL)	Alteration, nuclear		minimal	Low	29 day	46720
003017674026 (CEL)	Degeneration, granular, eosinophilic		minimal	Low	29 day	46720
003017674028 (CEL)	Alteration, nuclear		minimal	Low	29 day	46727
003017674028 (CEL)	Degeneration, granular, eosinophilic		minimal	Low	29 day	46727
003017656015 (CEL)	Atypia, nuclear	Hepatocyte	minimal	Middle	6 hr	27622
003017656015 (CEL)	Single cell necrosis	Hepatocyte	minimal	Middle	6 hr	27622
003017656016 (CEL)	Atypia, nuclear	Hepatocyte	minimal	Middle	6 hr	27626
003017656016 (CEL)	Single cell necrosis	Hepatocyte	minimal	Middle	6 hr	27626
No ChipData (---)	Atypia, nuclear	Hepatocyte	minimal	Middle	6 hr	27624
No ChipData (---)	Hypertrophy	Centrilobular	minimal	Middle	6 hr	27624
No ChipData (---)	Single cell necrosis	Hepatocyte	minimal	Middle	6 hr	27624
003017663012 (CEL)	Cellular infiltration		minimal	Middle	9 hr	27630
003017663012 (CEL)	Single cell necrosis	Hepatocyte	minimal	Middle	9 hr	27630
003017663013 (CEL)	Cellular infiltration		minimal	Middle	9 hr	27632
003017663013 (CEL)	Single cell necrosis	Hepatocyte	minimal	Middle	9 hr	27632
003017663014 (CEL)	Cellular infiltration		minimal	Middle	9 hr	27634
003017663014 (CEL)	Single cell necrosis	Hepatocyte	minimal	Middle	9 hr	27634
No ChipData (---)	Cellular infiltration		minimal	Middle	9 hr	27628
No ChipData (---)	Single cell necrosis	Hepatocyte	minimal	Middle	9 hr	27628
No ChipData (---)	Cellular infiltration		minimal	Middle	9 hr	27636
No ChipData (---)	Single cell necrosis	Hepatocyte	minimal	Middle	9 hr	27636
003017663024 (CEL)	Change, eosinophilic	Hepatocyte	minimal	Middle	24 hr	27640
003017663025 (CEL)	Cellular infiltration		minimal	Middle	24 hr	27644
003017663025 (CEL)	Change, eosinophilic	Hepatocyte	minimal	Middle	24 hr	27644
003017663025 (CEL)	Single cell necrosis	Hepatocyte	minimal	Middle	24 hr	27644
003017663026 (CEL)	Cellular infiltration		minimal	Middle	24 hr	27646
003017663026 (CEL)	Change, eosinophilic	Hepatocyte	minimal	Middle	24 hr	27646
003017663026 (CEL)	Single cell necrosis	Hepatocyte	minimal	Middle	24 hr	27646
No ChipData (---)	Change, eosinophilic	Hepatocyte	minimal	Middle	24 hr	27638
No ChipData (---)	Change, eosinophilic	Hepatocyte	minimal	Middle	24 hr	27642
003017664030 (CEL)	Change, eosinophilic	Hepatocyte	minimal	Middle	4 day	46744
003017664030 (CEL)	Hypertrophy	Centrilobular	minimal	Middle	4 day	46744
003017665001 (CEL)	Change, eosinophilic	Hepatocyte	minimal	Middle	4 day	46747
003017665001 (CEL)	Hypertrophy	Centrilobular	minimal	Middle	4 day	46747
003017665002 (CEL)	Change, eosinophilic	Hepatocyte	minimal	Middle	4 day	46750
003017665002 (CEL)	Hypertrophy	Centrilobular	minimal	Middle	4 day	46750
No ChipData (---)	Change, eosinophilic	Hepatocyte	minimal	Middle	4 day	46736
No ChipData (---)	Hypertrophy	Centrilobular	minimal	Middle	4 day	46736
No ChipData (---)	Single cell necrosis	Hepatocyte	minimal	Middle	4 day	46736
No ChipData (---)	Change, eosinophilic	Hepatocyte	minimal	Middle	4 day	46740
No ChipData (---)	Hypertrophy	Centrilobular	minimal	Middle	4 day	46740
003017665012 (CEL)	Cellular infiltration		minimal	Middle	8 day	46753
003017665012 (CEL)	Degeneration, granular, eosinophilic		slight	Middle	8 day	46753
003017665012 (CEL)	Hypertrophy	Centrilobular	slight	Middle	8 day	46753
003017665012 (CEL)	Single cell necrosis	Hepatocyte	minimal	Middle	8 day	46753
003017665013 (CEL)	Cellular infiltration		minimal	Middle	8 day	46756
003017665013 (CEL)	Degeneration, granular, eosinophilic		slight	Middle	8 day	46756
003017665013 (CEL)	Hypertrophy	Centrilobular	slight	Middle	8 day	46756
003017665013 (CEL)	Single cell necrosis	Hepatocyte	minimal	Middle	8 day	46756
003017665014 (CEL)	Cellular infiltration		minimal	Middle	8 day	46759
003017665014 (CEL)	Degeneration, granular, eosinophilic		slight	Middle	8 day	46759
003017665014 (CEL)	Hypertrophy	Centrilobular	minimal	Middle	8 day	46759
003017665014 (CEL)	Single cell necrosis	Hepatocyte	minimal	Middle	8 day	46759
No ChipData (---)	Degeneration, granular, eosinophilic		slight	Middle	8 day	46758
No ChipData (---)	Hypertrophy	Centrilobular	minimal	Middle	8 day	46758
No ChipData (---)	Single cell necrosis	Hepatocyte	minimal	Middle	8 day	46758
No ChipData (---)	Cellular infiltration		minimal	Middle	8 day	46763
No ChipData (---)	Degeneration, granular, eosinophilic		slight	Middle	8 day	46763
No ChipData (---)	Hypertrophy	Centrilobular	minimal	Middle	8 day	46763
No ChipData (---)	Single cell necrosis	Hepatocyte	minimal	Middle	8 day	46763
003017674017 (CEL)	Alteration, nuclear		minimal	Middle	15 day	46765
003017674017 (CEL)	Degeneration, granular, eosinophilic		slight	Middle	15 day	46765
003017674017 (CEL)	Hypertrophy	Centrilobular	slight	Middle	15 day	46765
003017674018 (CEL)	Alteration, nuclear		minimal	Middle	15 day	46769
003017674018 (CEL)	Degeneration, granular, eosinophilic		slight	Middle	15 day	46769
003017674018 (CEL)	Hypertrophy	Centrilobular	slight	Middle	15 day	46769
003017674019 (CEL)	Alteration, nuclear		minimal	Middle	15 day	46774
003017674019 (CEL)	Degeneration, granular, eosinophilic		slight	Middle	15 day	46774
003017674019 (CEL)	Hypertrophy	Centrilobular	slight	Middle	15 day	46774
No ChipData (---)	Alteration, nuclear		minimal	Middle	15 day	46768
No ChipData (---)	Degeneration, granular, eosinophilic		slight	Middle	15 day	46768
No ChipData (---)	Hypertrophy	Centrilobular	slight	Middle	15 day	46768
No ChipData (---)	Proliferation, oval cell		minimal	Middle	15 day	46768
No ChipData (---)	Alteration, nuclear		minimal	Middle	15 day	46772
No ChipData (---)	Degeneration, granular, eosinophilic		slight	Middle	15 day	46772
No ChipData (---)	Hypertrophy	Centrilobular	slight	Middle	15 day	46772
003017674029 (CEL)	Alteration, nuclear		minimal	Middle	29 day	46781
003017674029 (CEL)	Degeneration, granular, eosinophilic		slight	Middle	29 day	46781
003017674029 (CEL)	Hypertrophy	Centrilobular	minimal	Middle	29 day	46781
003017674030 (CEL)	Alteration, nuclear		minimal	Middle	29 day	46783
003017674030 (CEL)	Degeneration, granular, eosinophilic		slight	Middle	29 day	46783
003017674030 (CEL)	Hypertrophy	Centrilobular	minimal	Middle	29 day	46783
003017675001 (CEL)	Alteration, nuclear		slight	Middle	29 day	46787
003017675001 (CEL)	Cellular foci		minimal	Middle	29 day	46787
003017675001 (CEL)	Degeneration, granular, eosinophilic		slight	Middle	29 day	46787
003017675001 (CEL)	Hypertrophy	Centrilobular	slight	Middle	29 day	46787
No ChipData (---)	Alteration, nuclear		slight	Middle	29 day	46778
No ChipData (---)	Degeneration, granular, eosinophilic		slight	Middle	29 day	46778
No ChipData (---)	Hypertrophy	Centrilobular	slight	Middle	29 day	46778
No ChipData (---)	Alteration, nuclear		slight	Middle	29 day	46789
No ChipData (---)	Degeneration, granular, eosinophilic		slight	Middle	29 day	46789
No ChipData (---)	Hypertrophy	Centrilobular	minimal	Middle	29 day	46789
No ChipData (---)	Proliferation, oval cell		minimal	Middle	29 day	46789
003017656006 (CEL)	Hypertrophy	Centrilobular	minimal	High	3 hr	27651
003017656007 (CEL)	Hypertrophy	Centrilobular	minimal	High	3 hr	27655
No ChipData (---)	Hypertrophy	Centrilobular	minimal	High	3 hr	27657
003017656017 (CEL)	Atypia, nuclear	Hepatocyte	minimal	High	6 hr	27660
003017656017 (CEL)	Single cell necrosis	Hepatocyte	minimal	High	6 hr	27660
003017656018 (CEL)	Atypia, nuclear	Hepatocyte	minimal	High	6 hr	27665
003017656018 (CEL)	Single cell necrosis	Hepatocyte	minimal	High	6 hr	27665
003017656019 (CEL)	Atypia, nuclear	Hepatocyte	minimal	High	6 hr	27668
003017656019 (CEL)	Single cell necrosis	Hepatocyte	minimal	High	6 hr	27668
No ChipData (---)	Atypia, nuclear	Hepatocyte	minimal	High	6 hr	27662
No ChipData (---)	Atypia, nuclear	Hepatocyte	minimal	High	6 hr	27663
No ChipData (---)	Hypertrophy	Centrilobular	minimal	High	6 hr	27662
No ChipData (---)	Single cell necrosis	Hepatocyte	minimal	High	6 hr	27662
No ChipData (---)	Single cell necrosis	Hepatocyte	minimal	High	6 hr	27663
003017663015 (CEL)	Atypia, nuclear	Hepatocyte	minimal	High	9 hr	27670
003017663015 (CEL)	Cellular infiltration		minimal	High	9 hr	27670
003017663015 (CEL)	Single cell necrosis	Hepatocyte	minimal	High	9 hr	27670
003017663016 (CEL)	Cellular infiltration		minimal	High	9 hr	27672
003017663016 (CEL)	Change, eosinophilic	Hepatocyte	minimal	High	9 hr	27672
003017663016 (CEL)	Single cell necrosis	Hepatocyte	slight	High	9 hr	27672
003017663017 (CEL)	Cellular infiltration		minimal	High	9 hr	27678
003017663017 (CEL)	Change, eosinophilic	Hepatocyte	minimal	High	9 hr	27678
003017663017 (CEL)	Single cell necrosis	Hepatocyte	slight	High	9 hr	27678
No ChipData (---)	Cellular infiltration		minimal	High	9 hr	27674
No ChipData (---)	Cellular infiltration		minimal	High	9 hr	27676
No ChipData (---)	Change, eosinophilic	Hepatocyte	minimal	High	9 hr	27676
No ChipData (---)	Single cell necrosis	Hepatocyte	minimal	High	9 hr	27674
No ChipData (---)	Single cell necrosis	Hepatocyte	slight	High	9 hr	27676
003017663027 (CEL)	Cellular infiltration		slight	High	24 hr	27684
003017663027 (CEL)	Change, eosinophilic	Hepatocyte	minimal	High	24 hr	27684
003017663027 (CEL)	Hypertrophy	Centrilobular	slight	High	24 hr	27684
003017663027 (CEL)	Necrosis	Centrilobular	slight	High	24 hr	27684
003017663028 (CEL)	Cellular infiltration		slight	High	24 hr	27686
003017663028 (CEL)	Change, eosinophilic	Hepatocyte	minimal	High	24 hr	27686
003017663028 (CEL)	Hypertrophy	Centrilobular	slight	High	24 hr	27686
003017663028 (CEL)	Necrosis	Centrilobular	slight	High	24 hr	27686
003017663029 (CEL)	Cellular infiltration		slight	High	24 hr	27689
003017663029 (CEL)	Change, eosinophilic	Hepatocyte	minimal	High	24 hr	27689
003017663029 (CEL)	Hypertrophy	Centrilobular	slight	High	24 hr	27689
003017663029 (CEL)	Necrosis	Centrilobular	slight	High	24 hr	27689
No ChipData (---)	Cellular infiltration		slight	High	24 hr	27680
No ChipData (---)	Change, eosinophilic	Hepatocyte	minimal	High	24 hr	27680
No ChipData (---)	Hypertrophy	Centrilobular	slight	High	24 hr	27680
No ChipData (---)	Necrosis	Centrilobular	slight	High	24 hr	27680
No ChipData (---)	Cellular infiltration		slight	High	24 hr	27682
No ChipData (---)	Change, eosinophilic	Hepatocyte	minimal	High	24 hr	27682
No ChipData (---)	Hypertrophy	Centrilobular	slight	High	24 hr	27682
No ChipData (---)	Necrosis	Centrilobular	slight	High	24 hr	27682
003017665003 (CEL)	Cellular infiltration		minimal	High	4 day	46792
003017665003 (CEL)	Degeneration, granular, eosinophilic		slight	High	4 day	46792
003017665003 (CEL)	Hypertrophy	Centrilobular	slight	High	4 day	46792
003017665003 (CEL)	Single cell necrosis	Hepatocyte	minimal	High	4 day	46792
003017665004 (CEL)	Cellular infiltration		minimal	High	4 day	46795
003017665004 (CEL)	Degeneration, granular, eosinophilic		slight	High	4 day	46795
003017665004 (CEL)	Hypertrophy	Centrilobular	slight	High	4 day	46795
003017665004 (CEL)	Single cell necrosis	Hepatocyte	slight	High	4 day	46795
003017665005 (CEL)	Cellular infiltration		minimal	High	4 day	46800
003017665005 (CEL)	Degeneration, granular, eosinophilic		slight	High	4 day	46800
003017665005 (CEL)	Hypertrophy	Centrilobular	slight	High	4 day	46800
003017665005 (CEL)	Single cell necrosis	Hepatocyte	slight	High	4 day	46800
No ChipData (---)	Cellular infiltration		minimal	High	4 day	46797
No ChipData (---)	Degeneration, granular, eosinophilic		slight	High	4 day	46797
No ChipData (---)	Hypertrophy	Centrilobular	slight	High	4 day	46797
No ChipData (---)	Single cell necrosis	Hepatocyte	slight	High	4 day	46797
No ChipData (---)	Cellular infiltration		minimal	High	4 day	46803
No ChipData (---)	Degeneration, granular, eosinophilic		slight	High	4 day	46803
No ChipData (---)	Hypertrophy	Centrilobular	slight	High	4 day	46803
No ChipData (---)	Single cell necrosis	Hepatocyte	slight	High	4 day	46803
003017665015 (CEL)	Alteration, nuclear		minimal	High	8 day	46806
003017665015 (CEL)	Cellular infiltration		minimal	High	8 day	46806
003017665015 (CEL)	Degeneration, granular, eosinophilic		moderate	High	8 day	46806
003017665015 (CEL)	Hypertrophy	Centrilobular	slight	High	8 day	46806
003017665015 (CEL)	Single cell necrosis	Hepatocyte	slight	High	8 day	46806
003017665016 (CEL)	Alteration, nuclear		minimal	High	8 day	46811
003017665016 (CEL)	Cellular infiltration		minimal	High	8 day	46811
003017665016 (CEL)	Degeneration, granular, eosinophilic		moderate	High	8 day	46811
003017665016 (CEL)	Hypertrophy	Centrilobular	slight	High	8 day	46811
003017665016 (CEL)	Single cell necrosis	Hepatocyte	slight	High	8 day	46811
003017665017 (CEL)	Alteration, nuclear		minimal	High	8 day	46815
003017665017 (CEL)	Cellular infiltration		minimal	High	8 day	46815
003017665017 (CEL)	Degeneration, granular, eosinophilic		moderate	High	8 day	46815
003017665017 (CEL)	Hypertrophy	Centrilobular	slight	High	8 day	46815
003017665017 (CEL)	Single cell necrosis	Hepatocyte	slight	High	8 day	46815
No ChipData (---)	Alteration, nuclear		minimal	High	8 day	46809
No ChipData (---)	Cellular infiltration		minimal	High	8 day	46809
No ChipData (---)	Degeneration, granular, eosinophilic		moderate	High	8 day	46809
No ChipData (---)	Hypertrophy	Centrilobular	slight	High	8 day	46809
No ChipData (---)	Single cell necrosis	Hepatocyte	slight	High	8 day	46809
No ChipData (---)	Alteration, nuclear		minimal	High	8 day	46817
No ChipData (---)	Cellular infiltration		minimal	High	8 day	46817
No ChipData (---)	Degeneration, granular, eosinophilic		moderate	High	8 day	46817
No ChipData (---)	Hypertrophy	Centrilobular	slight	High	8 day	46817
No ChipData (---)	Single cell necrosis	Hepatocyte	slight	High	8 day	46817
003017674020 (CEL)	Alteration, nuclear		slight	High	15 day	46820
003017674020 (CEL)	Cellular foci		minimal	High	15 day	46820
003017674020 (CEL)	Degeneration, granular, eosinophilic		moderate	High	15 day	46820
003017674020 (CEL)	Hypertrophy	Centrilobular	slight	High	15 day	46820
003017674020 (CEL)	Proliferation, oval cell		minimal	High	15 day	46820
003017674021 (CEL)	Alteration, nuclear		slight	High	15 day	46823
003017674021 (CEL)	Degeneration, granular, eosinophilic		moderate	High	15 day	46823
003017674021 (CEL)	Hypertrophy	Centrilobular	slight	High	15 day	46823
003017674021 (CEL)	Proliferation, oval cell		minimal	High	15 day	46823
003017674022 (CEL)	Alteration, nuclear		slight	High	15 day	46826
003017674022 (CEL)	Cellular foci		minimal	High	15 day	46826
003017674022 (CEL)	Degeneration, granular, eosinophilic		moderate	High	15 day	46826
003017674022 (CEL)	Hypertrophy	Centrilobular	slight	High	15 day	46826
003017674022 (CEL)	Proliferation, oval cell		minimal	High	15 day	46826
No ChipData (---)	Alteration, nuclear		slight	High	15 day	46829
No ChipData (---)	Degeneration, granular, eosinophilic		moderate	High	15 day	46829
No ChipData (---)	Hypertrophy	Centrilobular	slight	High	15 day	46829
No ChipData (---)	Proliferation, oval cell		minimal	High	15 day	46829
No ChipData (---)	Alteration, nuclear		slight	High	15 day	46831
No ChipData (---)	Degeneration, granular, eosinophilic		moderate	High	15 day	46831
No ChipData (---)	Hypertrophy	Centrilobular	slight	High	15 day	46831
No ChipData (---)	Proliferation, oval cell		minimal	High	15 day	46831
003017675002 (CEL)	Alteration, nuclear		severe	High	29 day	46833
003017675002 (CEL)	Cellular foci		slight	High	29 day	46833
003017675002 (CEL)	Degeneration, granular, eosinophilic		severe	High	29 day	46833
003017675002 (CEL)	Fibrosis	Centrilobular	minimal	High	29 day	46833
003017675002 (CEL)	Hypertrophy	Centrilobular	moderate	High	29 day	46833
003017675002 (CEL)	Proliferation, bile duct		moderate	High	29 day	46833
003017675002 (CEL)	Proliferation, oval cell		slight	High	29 day	46833
003017675003 (CEL)	Alteration, nuclear		severe	High	29 day	46835
003017675003 (CEL)	Cellular foci		slight	High	29 day	46835
003017675003 (CEL)	Degeneration, granular, eosinophilic		severe	High	29 day	46835
003017675003 (CEL)	Fibrosis	Centrilobular	minimal	High	29 day	46835
003017675003 (CEL)	Hypertrophy	Centrilobular	moderate	High	29 day	46835
003017675003 (CEL)	Proliferation, bile duct		moderate	High	29 day	46835
003017675003 (CEL)	Proliferation, oval cell		slight	High	29 day	46835
003017675004 (CEL)	Alteration, nuclear		severe	High	29 day	46839
003017675004 (CEL)	Cellular foci		slight	High	29 day	46839
003017675004 (CEL)	Degeneration, granular, eosinophilic		severe	High	29 day	46839
003017675004 (CEL)	Fibrosis	Centrilobular	minimal	High	29 day	46839
003017675004 (CEL)	Hypertrophy	Centrilobular	moderate	High	29 day	46839
003017675004 (CEL)	Proliferation, bile duct		moderate	High	29 day	46839
003017675004 (CEL)	Proliferation, oval cell		slight	High	29 day	46839
No ChipData (---)	Alteration, nuclear		severe	High	29 day	46841
No ChipData (---)	Cellular foci		moderate	High	29 day	46841
No ChipData (---)	Degeneration, granular, eosinophilic		severe	High	29 day	46841
No ChipData (---)	Fibrosis	Centrilobular	minimal	High	29 day	46841
No ChipData (---)	Hypertrophy	Centrilobular	moderate	High	29 day	46841
No ChipData (---)	Proliferation, bile duct		moderate	High	29 day	46841
No ChipData (---)	Proliferation, oval cell		slight	High	29 day	46841
No ChipData (---)	Alteration, nuclear		severe	High	29 day	46844
No ChipData (---)	Cellular foci		slight	High	29 day	46844
No ChipData (---)	Degeneration, granular, eosinophilic		severe	High	29 day	46844
No ChipData (---)	Fibrosis	Centrilobular	minimal	High	29 day	46844
No ChipData (---)	Hypertrophy	Centrilobular	moderate	High	29 day	46844
No ChipData (---)	Proliferation, bile duct		moderate	High	29 day	46844
No ChipData (---)	Proliferation, oval cell		slight	High	29 day	46844
