# Supplementary material for: Integration of Adverse Outcome Pathways, Causal Networks and ‘Omics to Support Chemical Hazard Assessment
Source: Front Toxicol. 2022 Mar 24;4:786057. doi: 10.3389/ftox.2022.786057 (PMC8987526; doi:10.3389/ftox.2022.786057)
Supplement: Supplementary file 3 [file Table4.xlsx]

## Sheet: Table 4. Diazepam
CEL	Finding	Topography	Grade	Dose	Time	Whole slide glass Imag
003017736001 (CEL)	Hypertrophy	Centrilobular	minimal	Middle	29 day	6529
No ChipData (---)	Hypertrophy	Centrilobular	minimal	Middle	29 day	6530
003017735010 (CEL)	Degeneration, fatty	Periportal	minimal	High	4 day	6534
003017735012 (CEL)	Hypertrophy	Centrilobular	minimal	High	4 day	6536
003017735022 (CEL)	Hypertrophy	Centrilobular	minimal	High	8 day	6538
003017735023 (CEL)	Hypertrophy	Centrilobular	minimal	High	8 day	6540
No ChipData (---)	Hypertrophy	Centrilobular	minimal	High	8 day	6539
003017734028 (CEL)	Hypertrophy	Centrilobular	minimal	High	15 day	6544
003017734029 (CEL)	Hypertrophy	Centrilobular	minimal	High	15 day	6545
No ChipData (---)	Hypertrophy	Centrilobular	minimal	High	15 day	6547
003017734030 (CEL)	Hypertrophy	Centrilobular	slight	High	15 day	6546
No ChipData (---)	Hypertrophy	Centrilobular	slight	High	15 day	6543
No ChipData (---)	Hypertrophy	Centrilobular	minimal	High	29 day	6550
003017736004 (CEL)	Hypertrophy	Centrilobular	slight	High	29 day	6548
003017736005 (CEL)	Hypertrophy	Centrilobular	slight	High	29 day	6549
003017736006 (CEL)	Hypertrophy	Centrilobular	slight	High	29 day	6551
No ChipData (---)	Hypertrophy	Centrilobular	slight	High	29 day	6552
