# Supplementary material for: Integration of Adverse Outcome Pathways, Causal Networks and ‘Omics to Support Chemical Hazard Assessment
Source: Front Toxicol. 2022 Mar 24;4:786057. doi: 10.3389/ftox.2022.786057 (PMC8987526; doi:10.3389/ftox.2022.786057)
Supplement: Supplementary file 4 [file Table1.xlsx]

## Sheet: Table 1. Carbon tetrachloride
CEL	Finding	Topography	Grade	Dose	Time	Whole slide glass Imag
003017662012 (CEL)	Necrosis		minimal	Control	9 hr	26024
No ChipData (---)	Degeneration, fatty	Centrilobular	minimal	Low	4 day	26456
003017670014 (CEL)	Degeneration, fatty	Centrilobular	minimal	Low	4 day	26458
003017670015 (CEL)	Degeneration, fatty	Centrilobular	slight	Low	4 day	26459
003017670016 (CEL)	Degeneration, fatty	Centrilobular	minimal	Low	4 day	26461
No ChipData (---)	Degeneration, fatty	Centrilobular	minimal	Low	4 day	26463
003017670026 (CEL)	Degeneration, fatty	Centrilobular	slight	Low	8 day	26507
003017670027 (CEL)	Degeneration, fatty	Centrilobular	slight	Low	8 day	26509
No ChipData (---)	Cellular infiltration	Centrilobular	minimal	Low	8 day	26511
No ChipData (---)	Degeneration, fatty	Centrilobular	minimal	Low	8 day	26511
No ChipData (---)	Degeneration, fatty	Centrilobular	slight	Low	8 day	26513
003017670028 (CEL)	Cellular infiltration	Centrilobular	minimal	Low	8 day	26515
003017670028 (CEL)	Degeneration, fatty	Centrilobular	slight	Low	8 day	26515
003017672002 (CEL)	Cellular infiltration	Centrilobular	minimal	Low	15 day	26556
003017672002 (CEL)	Degeneration, fatty	Centrilobular	slight	Low	15 day	26556
003017672002 (CEL)	Degeneration, hydropic	Centrilobular	minimal	Low	15 day	26556
No ChipData (---)	Cellular infiltration	Centrilobular	minimal	Low	15 day	26559
No ChipData (---)	Degeneration, fatty	Centrilobular	minimal	Low	15 day	26559
003017672003 (CEL)	Cellular infiltration	Centrilobular	minimal	Low	15 day	26561
003017672003 (CEL)	Degeneration, fatty	Centrilobular	slight	Low	15 day	26561
No ChipData (---)	Cellular infiltration	Centrilobular	minimal	Low	15 day	26563
No ChipData (---)	Degeneration, fatty	Centrilobular	slight	Low	15 day	26563
003017672004 (CEL)	Cellular infiltration	Centrilobular	minimal	Low	15 day	26564
003017672004 (CEL)	Degeneration, fatty	Centrilobular	slight	Low	15 day	26564
No ChipData (---)	Cellular infiltration	Centrilobular	minimal	Low	29 day	26608
No ChipData (---)	Degeneration, fatty	Centrilobular	slight	Low	29 day	26608
No ChipData (---)	Degeneration, hydropic	Centrilobular	minimal	Low	29 day	26608
No ChipData (---)	Fibrosis	Centrilobular	minimal	Low	29 day	26608
003017672014 (CEL)	Cellular infiltration	Centrilobular	minimal	Low	29 day	26610
003017672014 (CEL)	Degeneration, fatty	Centrilobular	slight	Low	29 day	26610
003017672015 (CEL)	Cellular infiltration	Centrilobular	minimal	Low	29 day	26613
003017672015 (CEL)	Degeneration, fatty	Centrilobular	slight	Low	29 day	26613
003017672015 (CEL)	Fibrosis	Centrilobular	minimal	Low	29 day	26613
No ChipData (---)	Cellular infiltration	Centrilobular	minimal	Low	29 day	26616
No ChipData (---)	Degeneration, fatty	Centrilobular	slight	Low	29 day	26616
No ChipData (---)	Degeneration, hydropic	Centrilobular	minimal	Low	29 day	26616
No ChipData (---)	Fibrosis	Centrilobular	minimal	Low	29 day	26616
003017672016 (CEL)	Cellular infiltration	Centrilobular	minimal	Low	29 day	26620
003017672016 (CEL)	Degeneration, fatty	Centrilobular	slight	Low	29 day	26620
003017662006 (CEL)	Degeneration, hydropic	Centrilobular	minimal	Middle	6 hr	26001
No ChipData (---)	Degeneration, hydropic	Centrilobular	minimal	Middle	6 hr	26006
No ChipData (---)	Degeneration, fatty	Centrilobular	minimal	Middle	24 hr	26124
No ChipData (---)	Degeneration, fatty	Centrilobular	minimal	Middle	24 hr	26129
No ChipData (---)	Cellular infiltration	Centrilobular	minimal	Middle	4 day	26465
No ChipData (---)	Degeneration, fatty	Centrilobular	slight	Middle	4 day	26465
No ChipData (---)	Degeneration, hydropic	Centrilobular	slight	Middle	4 day	26465
003017670017 (CEL)	Cellular infiltration	Centrilobular	minimal	Middle	4 day	26467
003017670017 (CEL)	Degeneration, fatty	Centrilobular	slight	Middle	4 day	26467
No ChipData (---)	Cellular infiltration	Centrilobular	minimal	Middle	4 day	26470
No ChipData (---)	Degeneration, fatty	Centrilobular	slight	Middle	4 day	26470
003017670018 (CEL)	Cellular infiltration	Centrilobular	minimal	Middle	4 day	26472
003017670018 (CEL)	Degeneration, fatty	Centrilobular	slight	Middle	4 day	26472
003017670018 (CEL)	Degeneration, hydropic	Centrilobular	minimal	Middle	4 day	26472
003017670019 (CEL)	Cellular infiltration	Centrilobular	minimal	Middle	4 day	26474
003017670019 (CEL)	Degeneration, fatty	Centrilobular	slight	Middle	4 day	26474
003017670019 (CEL)	Degeneration, hydropic	Centrilobular	minimal	Middle	4 day	26474
003017670029 (CEL)	Cellular infiltration	Centrilobular	minimal	Middle	8 day	26516
003017670029 (CEL)	Degeneration, fatty	Centrilobular	slight	Middle	8 day	26516
003017670029 (CEL)	Degeneration, hydropic	Centrilobular	slight	Middle	8 day	26516
003017670030 (CEL)	Cellular infiltration	Centrilobular	minimal	Middle	8 day	26518
003017670030 (CEL)	Degeneration, fatty	Centrilobular	slight	Middle	8 day	26518
No ChipData (---)	Cellular infiltration	Centrilobular	minimal	Middle	8 day	26520
No ChipData (---)	Degeneration, fatty	Centrilobular	slight	Middle	8 day	26520
003017671001 (CEL)	Cellular infiltration	Centrilobular	minimal	Middle	8 day	26522
003017671001 (CEL)	Degeneration, fatty	Centrilobular	slight	Middle	8 day	26522
No ChipData (---)	Cellular infiltration	Centrilobular	minimal	Middle	8 day	26524
No ChipData (---)	Degeneration, fatty	Centrilobular	slight	Middle	8 day	26524
No ChipData (---)	Degeneration, hydropic	Centrilobular	minimal	Middle	8 day	26524
003017672005 (CEL)	Cellular infiltration	Centrilobular	minimal	Middle	15 day	26566
003017672005 (CEL)	Degeneration, fatty	Centrilobular	slight	Middle	15 day	26566
003017672005 (CEL)	Degeneration, hydropic	Centrilobular	minimal	Middle	15 day	26566
003017672005 (CEL)	Fibrosis	Centrilobular	minimal	Middle	15 day	26566
No ChipData (---)	Cellular infiltration	Centrilobular	minimal	Middle	15 day	26568
No ChipData (---)	Degeneration, fatty	Centrilobular	slight	Middle	15 day	26568
No ChipData (---)	Degeneration, hydropic	Centrilobular	minimal	Middle	15 day	26568
No ChipData (---)	Fibrosis	Centrilobular	minimal	Middle	15 day	26568
003017672006 (CEL)	Cellular infiltration	Centrilobular	minimal	Middle	15 day	26570
003017672006 (CEL)	Degeneration, fatty	Centrilobular	slight	Middle	15 day	26570
003017672006 (CEL)	Degeneration, hydropic	Centrilobular	minimal	Middle	15 day	26570
003017672006 (CEL)	Fibrosis	Centrilobular	minimal	Middle	15 day	26570
No ChipData (---)	Cellular infiltration	Centrilobular	minimal	Middle	15 day	26571
No ChipData (---)	Degeneration, fatty	Centrilobular	slight	Middle	15 day	26571
No ChipData (---)	Degeneration, hydropic	Centrilobular	minimal	Middle	15 day	26571
No ChipData (---)	Fibrosis	Centrilobular	minimal	Middle	15 day	26571
003017672007 (CEL)	Cellular infiltration	Centrilobular	minimal	Middle	15 day	26573
003017672007 (CEL)	Degeneration, fatty	Centrilobular	slight	Middle	15 day	26573
003017672007 (CEL)	Degeneration, hydropic	Centrilobular	minimal	Middle	15 day	26573
003017672007 (CEL)	Fibrosis	Centrilobular	minimal	Middle	15 day	26573
003017672017 (CEL)	Cellular infiltration	Centrilobular	minimal	Middle	29 day	26623
003017672017 (CEL)	Degeneration, fatty	Centrilobular	slight	Middle	29 day	26623
003017672017 (CEL)	Degeneration, hydropic	Centrilobular	slight	Middle	29 day	26623
003017672017 (CEL)	Fibrosis	Centrilobular	minimal	Middle	29 day	26623
003017672018 (CEL)	Cellular infiltration	Centrilobular	minimal	Middle	29 day	26626
003017672018 (CEL)	Degeneration, fatty	Centrilobular	moderate	Middle	29 day	26626
003017672018 (CEL)	Fibrosis	Centrilobular	minimal	Middle	29 day	26626
No ChipData (---)	Cellular infiltration	Centrilobular	minimal	Middle	29 day	26630
No ChipData (---)	Degeneration, fatty	Centrilobular	slight	Middle	29 day	26630
No ChipData (---)	Degeneration, hydropic	Centrilobular	minimal	Middle	29 day	26630
No ChipData (---)	Fibrosis	Centrilobular	minimal	Middle	29 day	26630
003017672019 (CEL)	Cellular infiltration	Centrilobular	minimal	Middle	29 day	26632
003017672019 (CEL)	Degeneration, fatty	Centrilobular	slight	Middle	29 day	26632
003017672019 (CEL)	Degeneration, hydropic	Centrilobular	slight	Middle	29 day	26632
003017672019 (CEL)	Fibrosis	Centrilobular	minimal	Middle	29 day	26632
No ChipData (---)	Cellular infiltration	Centrilobular	minimal	Middle	29 day	26635
No ChipData (---)	Degeneration, fatty	Centrilobular	slight	Middle	29 day	26635
No ChipData (---)	Degeneration, hydropic	Centrilobular	minimal	Middle	29 day	26635
No ChipData (---)	Fibrosis	Centrilobular	minimal	Middle	29 day	26635
No ChipData (---)	Degeneration, hydropic	Centrilobular	slight	High	3 hr	25961
003017661027 (CEL)	Degeneration, hydropic	Centrilobular	minimal	High	3 hr	25962
003017661028 (CEL)	Degeneration, hydropic	Centrilobular	minimal	High	3 hr	25964
003017662009 (CEL)	Cellular infiltration	Centrilobular	minimal	High	6 hr	26011
003017662009 (CEL)	Degeneration, hydropic	Centrilobular	minimal	High	6 hr	26011
003017662010 (CEL)	Degeneration, hydropic	Centrilobular	slight	High	6 hr	26013
No ChipData (---)	Degeneration, hydropic	Centrilobular	slight	High	6 hr	26016
No ChipData (---)	Degeneration, hydropic	Centrilobular	minimal	High	6 hr	26018
No ChipData (---)	Degeneration, hydropic	Centrilobular	minimal	High	9 hr	26074
No ChipData (---)	Cellular infiltration	Centrilobular	minimal	High	9 hr	26076
No ChipData (---)	Degeneration, hydropic	Centrilobular	minimal	High	9 hr	26076
003017662021 (CEL)	Degeneration, hydropic	Centrilobular	minimal	High	9 hr	26079
003017662022 (CEL)	Degeneration, hydropic	Centrilobular	minimal	High	9 hr	26081
003017663003 (CEL)	Cellular infiltration	Centrilobular	minimal	High	24 hr	26135
003017663003 (CEL)	Degeneration, fatty	Centrilobular	slight	High	24 hr	26135
003017663003 (CEL)	Degeneration, hydropic	Centrilobular	minimal	High	24 hr	26135
003017663004 (CEL)	Degeneration, fatty	Centrilobular	minimal	High	24 hr	26138
003017663005 (CEL)	Cellular infiltration	Centrilobular	minimal	High	24 hr	26140
003017663005 (CEL)	Degeneration, fatty	Centrilobular	slight	High	24 hr	26140
003017663005 (CEL)	Degeneration, hydropic	Centrilobular	minimal	High	24 hr	26140
No ChipData (---)	Degeneration, fatty	Centrilobular	slight	High	24 hr	26142
No ChipData (---)	Degeneration, hydropic	Centrilobular	minimal	High	24 hr	26142
No ChipData (---)	Cellular infiltration	Centrilobular	minimal	High	24 hr	26144
No ChipData (---)	Degeneration, fatty	Centrilobular	slight	High	24 hr	26144
No ChipData (---)	Degeneration, hydropic	Centrilobular	minimal	High	24 hr	26144
003017670020 (CEL)	Cellular infiltration	Centrilobular	minimal	High	4 day	26476
003017670020 (CEL)	Degeneration, fatty	Centrilobular	slight	High	4 day	26476
003017670020 (CEL)	Degeneration, hydropic	Centrilobular	slight	High	4 day	26476
No ChipData (---)	Cellular infiltration	Centrilobular	minimal	High	4 day	26479
No ChipData (---)	Degeneration, fatty	Centrilobular	minimal	High	4 day	26479
No ChipData (---)	Degeneration, hydropic	Centrilobular	moderate	High	4 day	26479
No ChipData (---)	Cellular infiltration	Centrilobular	minimal	High	4 day	26481
No ChipData (---)	Degeneration, fatty	Centrilobular	slight	High	4 day	26481
No ChipData (---)	Degeneration, hydropic	Centrilobular	slight	High	4 day	26481
003017670021 (CEL)	Cellular infiltration	Centrilobular	minimal	High	4 day	26483
003017670021 (CEL)	Degeneration, fatty	Centrilobular	slight	High	4 day	26483
003017670022 (CEL)	Cellular infiltration	Centrilobular	minimal	High	4 day	26485
003017670022 (CEL)	Degeneration, fatty	Centrilobular	slight	High	4 day	26485
003017670022 (CEL)	Degeneration, hydropic	Centrilobular	slight	High	4 day	26485
003017671002 (CEL)	Cellular infiltration	Centrilobular	minimal	High	8 day	26526
003017671002 (CEL)	Degeneration, fatty	Centrilobular	moderate	High	8 day	26526
003017671002 (CEL)	Degeneration, hydropic	Centrilobular	minimal	High	8 day	26526
003017671003 (CEL)	Cellular infiltration	Centrilobular	minimal	High	8 day	26528
003017671003 (CEL)	Degeneration, fatty	Centrilobular	slight	High	8 day	26528
003017671003 (CEL)	Degeneration, hydropic	Centrilobular	minimal	High	8 day	26528
003017671004 (CEL)	Cellular infiltration	Centrilobular	minimal	High	8 day	26530
003017671004 (CEL)	Degeneration, fatty	Centrilobular	slight	High	8 day	26530
003017671004 (CEL)	Degeneration, hydropic	Centrilobular	minimal	High	8 day	26530
No ChipData (---)	Cellular infiltration	Centrilobular	minimal	High	8 day	26532
No ChipData (---)	Degeneration, fatty	Centrilobular	slight	High	8 day	26532
No ChipData (---)	Degeneration, hydropic	Centrilobular	minimal	High	8 day	26532
No ChipData (---)	Cellular infiltration	Centrilobular	minimal	High	8 day	26534
No ChipData (---)	Degeneration, fatty	Centrilobular	slight	High	8 day	26534
003017672008 (CEL)	Cellular infiltration	Centrilobular	minimal	High	15 day	26575
003017672008 (CEL)	Degeneration, fatty	Centrilobular	moderate	High	15 day	26575
003017672008 (CEL)	Degeneration, hydropic	Centrilobular	minimal	High	15 day	26575
003017672009 (CEL)	Cellular infiltration	Centrilobular	minimal	High	15 day	26578
003017672009 (CEL)	Degeneration, fatty	Centrilobular	slight	High	15 day	26578
003017672009 (CEL)	Degeneration, hydropic	Centrilobular	slight	High	15 day	26578
003017672009 (CEL)	Fibrosis	Centrilobular	minimal	High	15 day	26578
No ChipData (---)	Cellular infiltration	Centrilobular	minimal	High	15 day	26580
No ChipData (---)	Degeneration, fatty	Centrilobular	slight	High	15 day	26580
No ChipData (---)	Degeneration, hydropic	Centrilobular	slight	High	15 day	26580
No ChipData (---)	Fibrosis	Centrilobular	minimal	High	15 day	26580
003017672010 (CEL)	Cellular infiltration	Centrilobular	minimal	High	15 day	26582
003017672010 (CEL)	Degeneration, fatty	Centrilobular	slight	High	15 day	26582
003017672010 (CEL)	Degeneration, hydropic	Centrilobular	minimal	High	15 day	26582
003017672010 (CEL)	Fibrosis	Centrilobular	minimal	High	15 day	26582
No ChipData (---)	Cellular infiltration	Centrilobular	minimal	High	15 day	26584
No ChipData (---)	Degeneration, fatty	Centrilobular	slight	High	15 day	26584
No ChipData (---)	Degeneration, hydropic	Centrilobular	minimal	High	15 day	26584
No ChipData (---)	Fibrosis	Centrilobular	minimal	High	15 day	26584
003017672020 (CEL)	Cellular infiltration	Centrilobular	minimal	High	29 day	26639
003017672020 (CEL)	Degeneration, fatty	Centrilobular	moderate	High	29 day	26639
003017672020 (CEL)	Degeneration, hydropic	Centrilobular	slight	High	29 day	26639
003017672020 (CEL)	Fibrosis	Centrilobular	minimal	High	29 day	26639
003017672021 (CEL)	Cellular infiltration	Centrilobular	minimal	High	29 day	26641
003017672021 (CEL)	Degeneration, fatty	Centrilobular	slight	High	29 day	26641
003017672021 (CEL)	Degeneration, hydropic	Centrilobular	slight	High	29 day	26641
003017672021 (CEL)	Fibrosis	Centrilobular	minimal	High	29 day	26641
003017672022 (CEL)	Cellular infiltration	Centrilobular	minimal	High	29 day	26644
003017672022 (CEL)	Degeneration, fatty	Centrilobular	slight	High	29 day	26644
003017672022 (CEL)	Degeneration, hydropic	Centrilobular	slight	High	29 day	26644
003017672022 (CEL)	Fibrosis	Centrilobular	minimal	High	29 day	26644
No ChipData (---)	Cellular infiltration	Centrilobular	minimal	High	29 day	26647
No ChipData (---)	Degeneration, fatty	Centrilobular	severe	High	29 day	26647
No ChipData (---)	Degeneration, hydropic	Centrilobular	slight	High	29 day	26647
No ChipData (---)	Fibrosis	Centrilobular	minimal	High	29 day	26647
No ChipData (---)	Cellular infiltration	Centrilobular	minimal	High	29 day	26651
No ChipData (---)	Degeneration, fatty	Centrilobular	moderate	High	29 day	26651
No ChipData (---)	Degeneration, hydropic	Centrilobular	slight	High	29 day	26651
No ChipData (---)	Fibrosis	Centrilobular	minimal	High	29 day	26651
