# Supplementary material for: Integration of Adverse Outcome Pathways, Causal Networks and ‘Omics to Support Chemical Hazard Assessment
Source: Front Toxicol. 2022 Mar 24;4:786057. doi: 10.3389/ftox.2022.786057 (PMC8987526; doi:10.3389/ftox.2022.786057)
Supplement: Supplementary file 5 [file Table5.xlsx]

## Sheet: Table 5. Simvastatin
CEL	Finding	Topography	Grade	Dose	Time	Whole slide glass Imag
003017369002 (CEL)	Necrosis	Subserosa	minimal	Control	3 hr	42034
003017401029 (CEL)	Vacuolization, cytoplasmic	Periportal	minimal	Control	9 hr	42054
003017401030 (CEL)	Vacuolization, cytoplasmic	Periportal	minimal	Control	9 hr	42056
No ChipData (---)	Microgranuloma		minimal	Control	4 day	42376
003017360019 (CEL)	Increased mitosis	Midlobular	minimal	Control	4 day	42381
No ChipData (---)	Necrosis	Subserosa	minimal	Control	8 day	42384
No ChipData (---)	Increased mitosis	Midlobular	minimal	Control	8 day	42388
No ChipData (---)	Necrosis	Subserosa	minimal	Control	24 hr	42061
003017402012 (CEL)	Vacuolization, cytoplasmic	Periportal	minimal	Control	24 hr	42067
No ChipData (---)	Microgranuloma		minimal	Control	15 day	42404
003017364030 (CEL)	Microgranuloma		minimal	Control	29 day	42412
003017365002 (CEL)	Alteration, cytoplasmic	Hepatocyte	P	Control	29 day	42416
003017360021 (CEL)	Necrosis	Subserosa	minimal	Low	4 day	42429
003017361002 (CEL)	Microgranuloma		minimal	Low	8 day	42437
003017364021 (CEL)	Change, basophilic	Periportal	minimal	Low	15 day	42447
003017364022 (CEL)	Change, basophilic	Periportal	minimal	Low	15 day	42449
No ChipData (---)	Microgranuloma		minimal	Low	15 day	42452
No ChipData (---)	Change, basophilic	Periportal	minimal	Low	15 day	42457
No ChipData (---)	Increased mitosis	Midlobular	minimal	Low	15 day	42457
003017365003 (CEL)	Change, basophilic	Periportal	minimal	Low	29 day	42460
003017365004 (CEL)	Change, basophilic	Periportal	minimal	Low	29 day	42463
003017365005 (CEL)	Change, basophilic	Periportal	minimal	Low	29 day	42468
003017365005 (CEL)	Increased mitosis	Midlobular	minimal	Low	29 day	42468
No ChipData (---)	Microgranuloma		minimal	Low	29 day	42471
003017369019 (CEL)	Necrosis	Subserosa	minimal	Middle	6 hr	42131
No ChipData (---)	Increased mitosis	Midlobular	slight	Middle	24 hr	42149
003017408004 (CEL)	Increased mitosis	Midlobular	minimal	Middle	24 hr	42152
No ChipData (---)	Increased mitosis	Midlobular	slight	Middle	24 hr	42154
003017402015 (CEL)	Increased mitosis	Midlobular	minimal	Middle	24 hr	42157
003017402016 (CEL)	Increased mitosis	Midlobular	minimal	Middle	24 hr	42159
003017360023 (CEL)	Microgranuloma		minimal	Middle	4 day	42473
No ChipData (---)	Increased mitosis	Midlobular	minimal	Middle	4 day	42476
003017360025 (CEL)	Necrosis	Subserosa	minimal	Middle	4 day	42483
003017361005 (CEL)	Change, basophilic	Periportal	minimal	Middle	8 day	42485
003017361006 (CEL)	Change, basophilic	Periportal	minimal	Middle	8 day	42488
003017361006 (CEL)	Increased mitosis	Midlobular	minimal	Middle	8 day	42488
No ChipData (---)	Change, basophilic	Periportal	minimal	Middle	8 day	42490
003017361007 (CEL)	Change, basophilic	Periportal	minimal	Middle	8 day	42493
No ChipData (---)	Change, basophilic	Periportal	minimal	Middle	8 day	42496
003017364024 (CEL)	Change, basophilic	Periportal	minimal	Middle	15 day	42498
003017364024 (CEL)	Increased mitosis	Midlobular	minimal	Middle	15 day	42498
003017364025 (CEL)	Change, basophilic	Periportal	minimal	Middle	15 day	42501
003017364025 (CEL)	Increased mitosis	Midlobular	minimal	Middle	15 day	42501
No ChipData (---)	Change, basophilic	Periportal	minimal	Middle	15 day	42503
No ChipData (---)	Increased mitosis	Midlobular	minimal	Middle	15 day	42503
No ChipData (---)	Microgranuloma		minimal	Middle	15 day	42503
003017364026 (CEL)	Change, basophilic	Periportal	minimal	Middle	15 day	42506
No ChipData (---)	Change, basophilic	Periportal	minimal	Middle	15 day	42508
No ChipData (---)	Microgranuloma		minimal	Middle	15 day	42508
No ChipData (---)	Change, basophilic	Periportal	slight	Middle	29 day	42511
No ChipData (---)	Change, basophilic	Periportal	slight	Middle	29 day	42513
003017365006 (CEL)	Change, basophilic	Periportal	slight	Middle	29 day	42516
003017365006 (CEL)	Necrosis	Subserosa	minimal	Middle	29 day	42516
003017365007 (CEL)	Change, basophilic	Periportal	slight	Middle	29 day	42519
003017365008 (CEL)	Change, basophilic	Periportal	slight	Middle	29 day	42521
003017365008 (CEL)	Increased mitosis	Midlobular	minimal	Middle	29 day	42521
003017402017 (CEL)	Increased mitosis	Midlobular	slight	High	24 hr	42196
003017402018 (CEL)	Increased mitosis	Midlobular	minimal	High	24 hr	42198
003017402019 (CEL)	Increased mitosis	Midlobular	slight	High	24 hr	42200
No ChipData (---)	Increased mitosis	Midlobular	minimal	High	24 hr	42203
No ChipData (---)	Vacuolization, cytoplasmic	Periportal	minimal	High	24 hr	42203
No ChipData (---)	Increased mitosis	Midlobular	minimal	High	24 hr	42205
No ChipData (---)	Necrosis	Subserosa	minimal	High	24 hr	42205
No ChipData (---)	Vacuolization, cytoplasmic	Periportal	minimal	High	24 hr	42205
No ChipData (---)	Change, basophilic	Periportal	minimal	High	4 day	42528
No ChipData (---)	Increased mitosis	Midlobular	minimal	High	4 day	42528
003017360027 (CEL)	Microgranuloma		minimal	High	4 day	42526
003017360028 (CEL)	Change, basophilic	Periportal	minimal	High	4 day	42531
003017360028 (CEL)	Increased mitosis	Midlobular	minimal	High	4 day	42531
003017361008 (CEL)	Change, basophilic	Periportal	minimal	High	8 day	42535
003017361009 (CEL)	Change, basophilic	Periportal	slight	High	8 day	42538
003017361010 (CEL)	Change, basophilic	Periportal	slight	High	8 day	42540
No ChipData (---)	Change, basophilic	Periportal	minimal	High	8 day	42542
No ChipData (---)	Increased mitosis	Midlobular	minimal	High	8 day	42542
No ChipData (---)	Change, basophilic	Periportal	slight	High	15 day	42547
003017364027 (CEL)	Change, basophilic	Periportal	slight	High	15 day	42550
003017364027 (CEL)	Increased mitosis	Midlobular	minimal	High	15 day	42550
003017364028 (CEL)	Change, basophilic	Periportal	minimal	High	15 day	42552
003017364028 (CEL)	Increased mitosis	Midlobular	minimal	High	15 day	42552
003017364029 (CEL)	Change, basophilic	Periportal	slight	High	15 day	42555
No ChipData (---)	DEAD	DEAD	P	High	15 day	-
003017365009 (CEL)	Change, basophilic	Periportal	slight	High	29 day	42558
003017365009 (CEL)	Microgranuloma		minimal	High	29 day	42558
003017365010 (CEL)	Change, basophilic	Periportal	slight	High	29 day	42561
003017365010 (CEL)	Increased mitosis	Midlobular	minimal	High	29 day	42561
003017365010 (CEL)	Microgranuloma		minimal	High	29 day	42561
No ChipData (---)	Change, basophilic	Periportal	slight	High	29 day	42565
No ChipData (---)	Increased mitosis	Midlobular	minimal	High	29 day	42565
No ChipData (---)	Microgranuloma		minimal	High	29 day	42565
No ChipData (---)	Change, basophilic	Periportal	slight	High	29 day	42568
No ChipData (---)	Increased mitosis	Midlobular	minimal	High	29 day	42568
No ChipData (---)	Microgranuloma		minimal	High	29 day	42568
003017365011 (CEL)	Change, basophilic	Periportal	slight	High	29 day	42571
003017365011 (CEL)	Increased mitosis	Midlobular	minimal	High	29 day	42571
003017365011 (CEL)	Microgranuloma		minimal	High	29 day	42571
